# Supplementary material for: Emerging investigator series: photocatalytic treatment of PFAS in a single-step ultrafiltration membrane reactor
Source: Royal Society of Chemistry journal article supplement (doi:10.1039/d4ew00224e), 2024-01-01
Supplement: d4ew00224e1.pdf [file d4ew00224e1.pdf]

1 **Photocatalytic Treatment of PFAS in Single-step Ultrafiltration Membrane**

2 **Reactor**

3 *Supplementary Information*

4 Allyson Leigh Junker <sup>a,b</sup>, Frederick Munk S. Christensen <sup>a</sup>, Lu Bai <sup>a</sup>, Mads Koustrup Jørgensen  
5 <sup>b</sup>, Peter Fojan <sup>c</sup>, Alaa Khalil <sup>b</sup>, Zongsu Wei <sup>a,\*</sup>

6

7 <sup>a</sup> Center for Water Technology (WATEC), Department of Bio- and Chemical Engineering,  
8 Aarhus University, Denmark

9 <sup>b</sup>Center for Membrane Technology (CMT), Department of Chemistry and Bioscience, Aalborg  
10 University, Denmark

11 <sup>c</sup> Department of Materials and Production, Faculty of Engineering and Science, Aalborg  
12 University, Denmark

13

14 \* Corresponding author. E-mail address: [zwei@bce.au.dk](mailto:zwei@bce.au.dk) Postal address: Aarhus University,  
15 Ole Worms Allé 3, 8000 Aarhus, Denmark

16

17 **Text S1.** Chemicals and materials

18 Adsorptive catalysts were synthesized from titanium (IV) oxide (GPR Rectapur  $\geq 99\%$ ,  
19 VWR Chemicals, Italy); powdered activated carbon, (20+40 mesh, Afla Aesar, Thermo  
20 Fischer, Germany); indium (II) nitrate hydrate ( $\geq 99.9\%$ , Sigma Aldrich, USA); gallium nitrate  
21 hydrate ( $>99.9\%$ , Acros Organics, Czech Republic); and iron (III) chloride hexahydrate  
22 ( $>99\%$ , Thermo Scientific, India). A stock solution of 0.1 M sodium hydroxide was made by  
23 dissolving reagent grade beads (VWR Life Sciences, USA) in pure water. Hydrochloric acid  
24 (37 vol.%, EMSURE®, Supelco, Austria) was diluted to an 0.1 M solution with ultrapure water.  
25 Ultrapure water was generated by a Millipore Instrument (Molsheim, France) equipped with a  
26 Millipak® 0.22  $\mu\text{m}$  filter and a Q-Guard® 1 purification cartridge (Merck Millipore). Prior to  
27 modifications, UF membranes were washed with ultrapure water and methanol (GPR Rectapur,  
28 VWR, France). Grafting solutions were made from acrylic acid (Sigma Aldrich, Germany),  
29 isopropanol ( $\geq 99.5\%$ , Sigma Aldrich, Germany), dopamine hydrochloride (Sigma Aldrich,  
30 Merck, Germany) and potassium phosphate buffer solution (0.2 M, Thermo Fisher Scientific,  
31 Germany), adjusted to pH = 8 using 0.1 M NaOH solution.

32 Perfluorooctanoic acid (PFOA,  $>98\%$ ), nonafluoro-1-butananesulfonic acid (PFBS,  $>98\%$ ),  
33 and heptafluorobutyric acid ( $>98\%$ , PFBA) were purchased from Tokyo Chemical Industry,  
34 Co. Ltd. (Japan); heptadecafluoro-1-octanesulphonic acid (H-PFOS,  $>97\%$ ) was purchased from abcr,  
35 GmbH (Germany). Powdered PFAS were dissolved in methanol, then diluted to the desired  
36 stock solution concentration with ultrapure water. PFAS standards were made regularly from  
37 dissolving pure contaminants in a 50:50 methanol-water solution and used for calibration.  
38 Fluoride Standard (Orion ionplus®, Thermo Scientific, USA) was used as the analytical  
39 standard for calibrating the IC. Dilutions of pure formic ( $\geq 99\%$ , HiPerSolv Chromanorm®,  
40 VWR Chemicals, United Kingdom) and acetic acid ( $\geq 99\%$ , ReagentPlus®, Sigma Aldrich,

41 USA) in ultrapure water, individually and combined with fluoride ion standards, were used to  
42 confirm observed acetate and formate peaks using the IC.

43 All samples were collected using polypropylene/polyethylene syringes (5 mL Luer,  
44 Chirana) and filtered through PES filters 0.45  $\mu\text{m}$  (Captiva Econofilter, Agilent), before  
45 transferring to analysis vials, except for permeate samples, which were directly transferred  
46 analysis vials without additional filtration. For ion chromatography, 5 mL PP analysis vials  
47 and caps (PolyVials, Thermo Fisher Scientific) were used, while 2 mL PP vials and caps with  
48 silicon/PFTE septum were used for liquid chromatography (SureSTART™, Thermo Fisher  
49 Scientific).

#### 50 **Text S2.** Photocatalyst synthesis

51 Iron-, indium-, and gallium-enhanced titanium nanotubes on activated carbon (TNT@AC)  
52 were synthesized using hydrothermal and doping methods, which have been documented in  
53 detail by others. Briefly, titanium dioxide and powdered activated carbon were stirred in a basic  
54 solution for 12 hours, then baked at 130 °C for 72 hours. Next, the suspension was washed to  
55 achieve a neutral pH, then centrifuged, decanted, and dried at 105 °C overnight. The TNT@AC  
56 particles were resuspended in ultrapure water, to which the respective 0.1 M metal salt solution  
57 were added to achieve the targeted amounts: 1 wt.% iron, 2 wt.% gallium, and 2 wt.% indium.  
58 After neutral pH adjustment, the suspension was stirred overnight. Then, the suspension was  
59 centrifuged, decanted, and dried before being calcinated at 550°C for 3 hours with nitrogen  
60 flow (approximately 200 mL/min). Finally, any organic residues were removed from the  
61 calcinated particles by washing in ultrapure water, then centrifuged, decanted, and dried at  
62 105°C for 24 hours. Dried catalyst was stored in screw top PP tubes.

#### 63 **Text S3.** Photocatalytic membrane grafting methods

64 Although polyvinylidene fluoride (PVDF) is considered the most robust polymeric  
65 membrane material, it could potentially contaminate tests as a fluorinated polymer. Therefore,  
66 polyethersulfone (PES), which has also good chemical stability and heat tolerance, was chosen  
67 as the basis for the UF membrane modifications. For the acrylic acid graft, the membrane  
68 surface was first cleaned and activated by generating plasma under anaerobic conditions for  
69 300 seconds at power 50 W using an ENI model ACG-6B generator. Anaerobic conditions in  
70 the plasma reactor were ensured by purging the chamber with nitrogen gas three times and  
71 pumping a vacuum before the generator was switched on. The activated membranes were  
72 immediately immersed in an acrylic acid solution (15 vol.% in isopropanol) at 60 °C for two  
73 hours.

74 The polydopamine grafting method consisted of cleaning the membrane via sonication in  
75 methanol and ultrapure water (for 5 minutes each solution). Then, the cleaned membranes were  
76 immersed in a buffered dopamine hydrochloride solution (1 g/L of dopamine hydrochloride,  
77 pH = 8) under continuously stirring, where they were allowed to spontaneous polymerization  
78 under aerobic conditions for 2 to 5 hours.

79 After grafting, the photocatalyst was deposited onto the grafted membranes via vacuum  
80 filtration. This method allowed for better control of the catalyst loading, ranging from 2.5 mg  
81 to 25 mg per membrane. Coated membranes were rinsed with ultrapure water to remove any  
82 unadhered particles. The rinse water was filtered through a 2 µm glass fiber filter (Whatman,  
83 47 mm diameter) and dried, before weighing dried residuals to determine final catalyst loading  
84 on the membrane. Coated membranes were stored refrigerated in ultrapure water to prevent  
85 cracking of the polydopamine coating when dried. A summary of the synthesized membranes  
86 is provided in the SI (Tables S1 and S2). For comparison, photocatalyst was also loosely loaded  
87 on an unmodified, commercial nanofiltration (NF) membrane (Alfa Laval NF, MWCO = 300

88 Da) by vacuum filtration of Fe/TNT@AC particles suspended in water, then placed directly in  
89 the reactor.

90 **Table S1.** Inventory of the photocatalytic membranes synthesized with acrylic acid grafting solution.

| Membrane ID | Catalyst Coating | Catalyst Loading (mg) | Avg. Catalyst Loading (mg) | Catalyst Loading (wt.% of membrane) | Avg. Catalyst Loading (wt.% of membrane) |
|-------------|------------------|-----------------------|----------------------------|-------------------------------------|------------------------------------------|
| AAT 002     | TNT@AC           | 0.6                   | 0.7                        | 0.28%                               | 0.32%                                    |
| AAT 003     | TNT@AC           | 0.5                   |                            | 0.23%                               |                                          |
| AAT 004     | TNT@AC           | 1.0                   |                            | 0.46%                               |                                          |
| AAI 004     | In/TNT@AC        | 2.8                   | 2.9                        | 1.28%                               | 1.31%                                    |
| AAI 005     | In/TNT@AC        | 2.7                   |                            | 1.24%                               |                                          |
| AAI 006     | In/TNT@AC        | 3.1                   |                            | 1.42%                               |                                          |
| AAI 007     | In/TNT@AC        | 13.4                  | 13.6                       | 9.02%                               | 9.13%                                    |
| AAI 008     | In/TNT@AC        | 13.2                  |                            | 8.88%                               |                                          |
| AAI 009     | In/TNT@AC        | 14.1                  |                            | 9.49%                               |                                          |
| AAG 004     | Ga/TNT@AC        | 3.6                   | 3.0                        | 1.65%                               | 1.38%                                    |
| AAG 005     | Ga/TNT@AC        | 2.7                   |                            | 1.24%                               |                                          |
| AAG 006     | Ga/TNT@AC        | 2.7                   |                            | 1.24%                               |                                          |
| AAG 007     | Ga/TNT@AC        | 11.0                  | 10.7                       | 7.40%                               | 7.18%                                    |
| AAG 008     | Ga/TNT@AC        | 10.5                  |                            | 7.07%                               |                                          |
| AAG 009     | Ga/TNT@AC        | 10.5                  |                            | 7.07%                               |                                          |
| AAF 004     | Fe/TNT@AC        | 2.7                   | 2.0                        | 1.24%                               | 0.92%                                    |
| AAF 005     | Fe/TNT@AC        | 1.5                   |                            | 0.69%                               |                                          |
| AAF 006     | Fe/TNT@AC        | 1.8                   |                            | 0.83%                               |                                          |
| AAF 007     | Fe/TNT@AC        | 13.8                  | 13.9                       | 9.29%                               | 9.35%                                    |
| AAF 008     | Fe/TNT@AC        | 14.0                  |                            | 9.42%                               |                                          |

91

92

93 **Table S2.** Inventory of the photocatalytic membranes synthesized with polydopamine grafting solution.

| Membrane ID | Catalyst Coating | Grafting Solution | Catalyst Loading (mg) | Avg. Catalyst Loading (mg) | Catalyst Loading (wt.% of membrane) | Avg. Catalyst Loading (wt.% of membrane) | Polymerization Time (hours) |
|-------------|------------------|-------------------|-----------------------|----------------------------|-------------------------------------|------------------------------------------|-----------------------------|
| PDT_001     | TNT@AC           | PDA               | 3.2                   | 3.2                        |                                     | 2.09%                                    | 3 h                         |
| PDI_001     | In/TNT@AC        | PDA               | 10.1                  | 12.4                       | 6.59%                               | 8.06%                                    | 4 h                         |
| PDI_002     | In/TNT@AC        | PDA               | 14.6                  |                            | 9.52%                               |                                          | 5 h                         |
| PDG_001     | Ga/TNT@AC        | PDA               | 6.3                   | 8.2                        | 4.11%                               | 5.35%                                    | 3 h                         |
| PDG_002     | Ga/TNT@AC        | PDA               | 10.1                  |                            | 6.59%                               |                                          | 5 h                         |
| PDF_001     | Fe/TNT@AC        | PDA               | 15.6                  | 14.2                       | 10.18%                              | 6.79%                                    | 4 h                         |
| PDF_002     | Fe/TNT@AC        | PDA               | 15.5                  |                            | 7.1%                                |                                          | 2                           |
| PDF_003     | Fe/TNT@AC        | PDA               | 3.9                   |                            | 1.8%                                |                                          | 2.5                         |
| PDF_004     | Fe/TNT@AC        | PDA               | 10                    |                            | 4.6%                                |                                          | 3                           |
| PDF_005     | Fe/TNT@AC        | PDA               | 20.2                  |                            | 9.3%                                |                                          | 3                           |
| PDF_006     | Fe/TNT@AC        | PDA               | 15.9                  |                            | 7.3%                                |                                          | 3                           |
| PDF_007     | Fe/TNT@AC        | PDA               | 17.04                 |                            | 7.8%                                |                                          | 3                           |
| PDF_008     | Fe/TNT@AC        | PDA               | 5.25                  |                            | 2.4%                                |                                          | 3.5                         |
| PDF_009     | Fe/TNT@AC        | PDA               | 13.37                 |                            | 6.1%                                |                                          | 3                           |
| PDF_010     | Fe/TNT@AC        | PDA               | 24.76                 |                            | 11.4%                               |                                          | 3.25                        |

95 **Text S4. Batch slurry tests**

96 Batch tests were conducted in slurry, where photocatalysts were suspended in lab-  
97 contaminated water, then irradiated. An aliquot of 40 mL 200 ppb PFOA in ultrapure water  
98 was allowed to adsorb to the photocatalyst for 30 minutes. Since investigating its defluorination  
99 ability was the focus of the experiment, a high dose of photocatalyst (1 g/L) was selected to  
100 ensure adsorption of PFOA prior to photodegradation. Then, the solution was centrifuged and  
101 decanted. The decanted solution was prepared for UPLC-MS/MS analysis. Meanwhile, the  
102 settled catalyst and 10 mL of solution were transferred to a quartz reactor, placed in the  
103 photoreactor and irradiated for 4 hours. After irradiation, the sample was filtered and  
104 transferred to vials for UPLC-MS/MS and IC analyses. For comparison, parallel experiments  
105 were run with the three UV chips (PureFize) as the light source.

106 **Text S5. Photocatalytic membrane reactor (PMR) cleaning procedure**

107 After running an experiment, all lines were drained of contaminated lab water. Then,  
108 ultrapure water was pumped through the system for 10 minutes. Next, the membrane was  
109 removed from the PMR and stored in a 0.1% sodium sulfide solution at 4°C. A methanol  
110 solution (10 vol. %) was then pumped through the system for 10 minutes, followed by another  
111 10-minute rinse with ultrapure water. A sample was collected at the end of the cleaning cycle  
112 to verify there was no contamination of the system.

113 **Text S6. Analysis and Characterization**

114 *Membrane Characterization*

115 Topographical scans of the unmodified, grafted, and coated membranes were taken using a  
116 Solver AFM (NT-MDT Spectrum) fit with a microcantilever (AC 160 TS, Oxford  
117 Instruments); scans were processed using WSxM imaging software. SEM images were  
118 collected using a NOVA nano SEM 600 instrument with TLD detector. Prior to SEM scans,



119 membranes were sputtered with a 6-nm thick platinum coat using a high vacuum sputter system  
120 (Leica EM SCD 500). Data from SEM-EDX (TM3030plus, Hitachi High-Tech) were analyzed  
121 via the Cliff-Lorimer Ratio method.

122 An optical tensiometer (OneAttension Theta Lite, Biolin Scientific, Finland), fitted with a  
123 200  $\mu\text{L}$  tip, released a 4  $\mu\text{L}$  drop of water onto the membrane surface while capturing 20 frames  
124 per second, from which the water contact angles were measured in ImageJ (NIH, public  
125 domain). The streaming surface potentials were measured at neutral pH using an electrokinetic  
126 analyzer (SurPASS, Anton Paar GmbH, Austria). Finally, the pore sizes of the membranes  
127 were verified by wet and dry analysis on a porometer (POROLUX<sup>TM</sup> 1000, Germany), after  
128 soaking samples in the manufacturer's Porefil<sup>TM</sup> solution; pressure was ramped up from 0 to  
129 35 bar, while the instrument recorded nitrogen gas flow through the membrane.

### 130 *Fluorine ion analysis*

131 An ion chromatograph (Dionex<sup>TM</sup> Aquion AS-DV, Thermo Scientific) with a Dionex<sup>TM</sup>  
132 IonPac<sup>TM</sup> AS23 analytical column ( $2 \times 250$  mm) and guard column was used to measure  $\text{F}^-$   
133 concentrations following batch experiments. The instrument was also equipped with a  
134 Dionex<sup>TM</sup> AERS 500 carbonate suppressor (2 mm) ahead of the conductivity cell, which was  
135 kept at 35 °C and had a collection rate of 5 Hz. A sodium carbonate/bicarbonate (Dionex<sup>TM</sup>  
136 AS23 Eluent, Thermo Scientific) eluent solution was used. Sample was injected and eluted  
137 through the column at 0.25 mL/min for 30 minutes.

### 138 *PFAS extraction and analysis*

139 To extract adsorbed PFAS for quantification, photocatalyst particles were removed from  
140 slurry and placed in methanol and heated for 4 hours at 80 °C. After PMR testing, the  
141 photocatalytic membrane was removed and placed directly in a solution of 100 mmol/L

142 ammonium acetate in methanol, and sonicated for 30 minutes. After extraction, the  
143 supernatants were filtered, then analyzed by UPLC-MS/MS.

144 Ultra-high performance liquid chromatography with mass spectroscopy (UPLC-MS/MS)  
145 was used for the identification and quantification of PFAS and its degradation byproducts in  
146 aqueous and extraction samples. The UPLC instrument used was a Thermo Scientific Dionex™  
147 UltiMate 3000 series. The UPLC was equipped with an analytical column (Waters™  
148 ACQUITY UPLC® HSS T3, 1.8 μm, 2.1 x 100 mm) with a guard column (Waters™  
149 ACQUITY UPLC® HSS T3 VanGuard Pre-column, 1.8 μm, 2.1 × 5 mm ), and the same  
150 chromatographic method was used. An aliquot of 5 μL of sample was injected to the analytical  
151 column, which was maintained at 35 °C. Then, the organics were eluted from the column using  
152 a mobile phase gradient program at 0.25 mL/minute (see SI). The main components of the  
153 mobile phase were ultrapure water, methanol, and ammonium formate (2 mM). The mobile  
154 phase gradient program was:

- 155 • Two minutes with a mobile phase of 12.5% Solution B.
- 156 • Increase to 75% Solution B over 5 minutes.
- 157 • Increase to 97.5% Solution B over 11 minutes.
- 158 • Hold for 4 minutes with 97.5% Solution B.
- 159 • Decreased to 12.5% Solution B and maintained for 3 minutes to re-equilibrate the  
160 column.

161 Solution A was a mixture of demineralized water:methanol (20:80, v/v) with 2 mM of  
162 ammonium formate. Solution B was 2 mM of ammonium formate in methanol.

163 Eluted samples were analyzed on a mass spectrometer (MS) with electrospray ionization  
164 (ESI). Either a Bruker compact quadrupole time-of-flight (QToF) MS or a TSQ Fortis Plus  
165 Triple Quadrupole MS was used for detection. The detection methods varied slightly for each

166 instrument. The Bruker compact QToF MS was set up in the negative ion mode, at a dry  
167 temperature of 300 °C, a dry gas flow of 5.0 L/minute, cone voltage of 500 V, and the nebulizer  
168 setting at 2.0 bar. The TSQ Fortis Plus Triple Quadrupole MS was set up in the negative ion  
169 mode (2500 V) with a vaporizer temperature of 300 °C and ion transfer tube temperature of  
170 325 °C. Different SRM parameters were set for each compound and are provided in the  
171 following table.

172

**Table S3:** SRM parameters for TSQ Fortis Plus Triple Quadrupole Mass Spectrometer.

| <b>Compound</b> | <b>Start<br/>time<br/>(min)</b> | <b>End<br/>time<br/>(min)</b> | <b>Precursor<br/>(m/z)</b> | <b>Product<br/>(m/z)</b> | <b>Collision<br/>Energy<br/>(V)</b> | <b>Minimum<br/>Dwell<br/>Time (ms)</b> |
|-----------------|---------------------------------|-------------------------------|----------------------------|--------------------------|-------------------------------------|----------------------------------------|
| TFAA            | 0.9                             | 1.8                           | 112.873                    | 68.967                   | 10                                  | 299.271                                |
| PFPrA           | 1.8                             | 4                             | 162.853                    | 119.05                   | 8.94                                | 299.271                                |
| PFBA            | 4                               | 6                             | 212.853                    | 169.05                   | 7                                   | 40.513                                 |
| PFBS            | 5                               | 7                             | 298.91                     | 79.967                   | 31.78                               | 40.513                                 |
| PFHxA           | 5                               | 8                             | 312.856                    | 269.05                   | 7.43                                | 40.513                                 |
| PFHxS           | 5                               | 10                            | 398.91                     | 79.883                   | 38.73                               | 40.513                                 |
| PFOA            | 5                               | 11                            | 412.933                    | 369.05                   | 7.86                                | 40.513                                 |
| PFOS            | 5                               | 11                            | 498.813                    | 79.967                   | 47.11                               | 40.513                                 |

#### *Quality control and data analysis*

Calibrations using analytical standards were performed on all instruments for the selected compounds. Blanks were run at the beginning and end of each analysis group to validate the baseline and verify there was no contamination. Additionally, standards were run with each analysis group. In all instances, >90% recovery of standards was observed on the IC. The detection limits were 0.05 ppm fluorine ion for the IC, and 0.001  $\mu\text{M}$  for PFAS analyzed by UPLC-MS/MS. Samples were analyzed using double and triple injections on the IC and UPLC-MS/MS, respectively; results are reported as an average of the injections, unless there was an outlier, in which case the outlier was removed.

Non-detect or results below the detection limits (BDL) of the instrument were treated as zero value when analyzing the data. The PFAS removal efficiency was calculated by

subtracting the final concentration from the initial concentration, dividing by the initial concentration, and converting to a percentage. The maximum theoretical F<sup>-</sup> concentration was calculated based on the initial PFOA concentration, its molecular weight, and the number of fluorine atoms in the molecule (Equation S1). Then, the defluorination rate (deF%) of PFOA was calculated by dividing the fluoride anion (F<sup>-</sup>) concentration by the theoretical maximum concentration and converting to a percentage (Equation S2):

$$[F^-]_{theoretical} = [PFOA]_0 \times \frac{MW_F \times 15}{MW_{PFOA}} \quad (S1)$$

$$deF\% = \frac{[F^-]_{released}}{[F^-]_{theoretical}} \times 100\% \quad (S2)$$

where  $[F^-]_{theoretical}$  is the theoretical concentration of fluorine ions, if all the initial PFOA,  $[PFOA]_0$ , is mineralized;  $MW_F$  and  $MW_{PFOA}$  are the molecular weights of fluorine ion and PFOA, respectively; and  $[F^-]_{released}$  is the measured fluorine ion concentration after treatment.

**Table S4:** PFAS compounds observed in samples following the batch photodegradation tests

| Sample                      | Catalyst  | PFOA, ppb average (range) | PFHxA, ppb average (range) | PFBA, ppb average (range) | PFPrA, ppb average (range) | Average percent removal of PFOA |
|-----------------------------|-----------|---------------------------|----------------------------|---------------------------|----------------------------|---------------------------------|
| <b>November 2022 Trials</b> |           |                           |                            |                           |                            |                                 |
| Initial                     | n/a       | 351 (348 - 352)           | 0 (ND - 0)                 | ND                        | ND                         | n/a                             |
| After adsorption            | TNT@AC    | 137 (ND – 145)            | ND                         | ND                        | ND                         | 73.7%                           |
|                             | In/TNT@AC | 14 (ND – 29)              | ND                         | ND                        | ND                         | 95.9%                           |
|                             | Ga/TNT@AC | 31 (ND – 63)              | ND                         | ND                        | ND                         | 91.0%                           |
|                             | Fe/TNT@AC | 13 (ND – 26)              | ND                         | ND                        | ND                         | 96.3%                           |
| After irradiation           | TNT@AC    | 1 (ND – 2)                | ND                         | ND                        | 0.1 (ND – 0.2)             | 99.3%                           |
|                             | In/TNT@AC | 0.5 (ND – 2)              | ND                         | ND                        | 0 (ND – 0.5)               | 99.8%                           |
|                             | Ga/TNT@AC | 1 (ND – 3)                | ND                         | ND                        | ND                         | 99.6%                           |
|                             | Fe/TNT@AC | 0.6 (ND – 1)              | ND                         | ND                        | ND                         | 99.8%                           |
| Extracted after irradiation | TNT@AC    | 313 (284 – 341)           | 2                          | 0.4                       | ND                         | 89.3%                           |
|                             | In/TNT@AC | 459 (446 – 471)           | 2 (2-3)                    | ND                        | ND                         | 131%                            |
|                             | Ga/TNT@AC | 548 (541 – 555)           | 1 (1 – 2)                  | ND                        | ND                         | 156%                            |
|                             | Fe/TNT@AC | 501 (478 – 524)           | 3 (2 – 5)                  | ND                        | ND                         | 143%                            |
| Control – 4h UVC            | n/a       | 389 (356 – 421)           | 1                          | ND                        | ND                         | -11%                            |
| <b>February 2023 Trials</b> |           |                           |                            |                           |                            |                                 |
| Initial                     | n/a       | 135 (125 – 142)           | 0 (ND – 0.3)               | ND                        | ND                         | n/a                             |

|                                     |           |                |    |    |    |       |
|-------------------------------------|-----------|----------------|----|----|----|-------|
| After adsorption<br>and irradiation | TNT@AC    | ND             | ND | ND | ND | 100%  |
|                                     | In/TNT@AC | ND             | ND | ND | ND | 100%  |
|                                     | Ga/TNT@AC | 0.2 (ND – 0.4) | ND | ND | ND | 99.8% |
|                                     | Fe/TNT@AC | ND             | ND | ND | ND | 100%  |
| Control – 4h<br>dark                | Fe/TNT@AC | 2              | ND | ND | ND | 98.5% |
| Control – 4h<br>UVC                 | n/a       | 120            | ND | ND | ND | 10.7% |

*ND = non-detect*

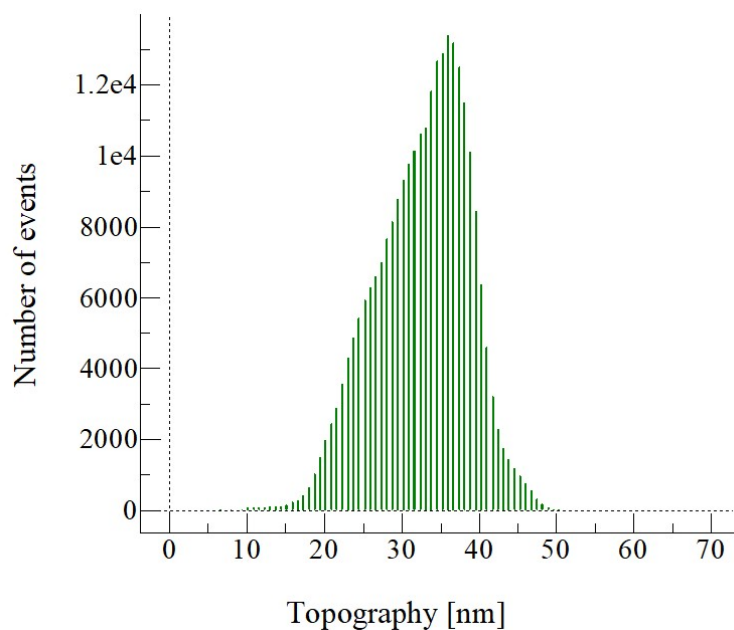

**Figure S1.** Height histogram of the pristine membrane, showing the number of times each height was recorded during the topographical AFM scan.

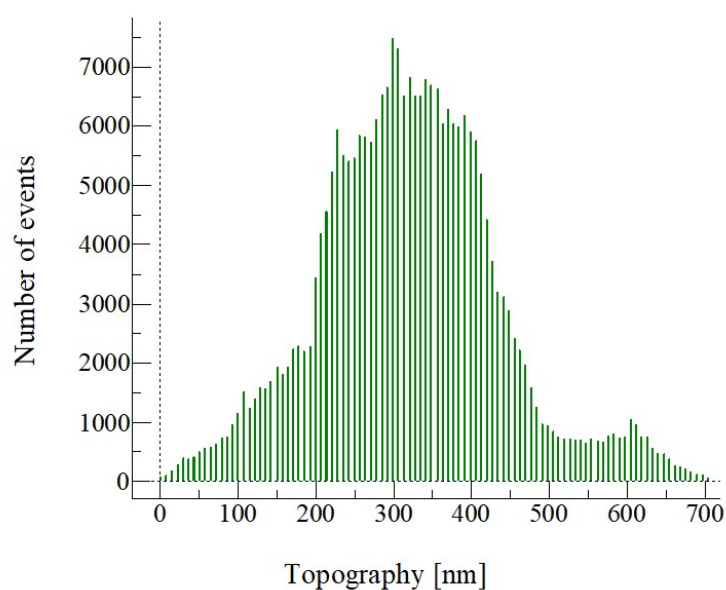

**Figure S2.** Height histogram of the polydopamine-grafted membrane, showing the number of times each height was recorded during the topographical AFM scan.



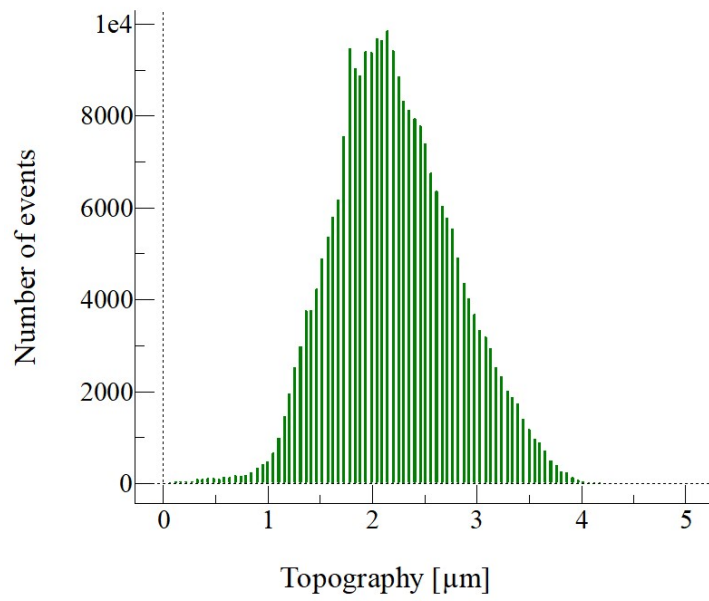

**Figure S3.** Height histogram of the Fe/TNT@AC coated membrane, showing the number of times each height was recorded during the topographical AFM scan.

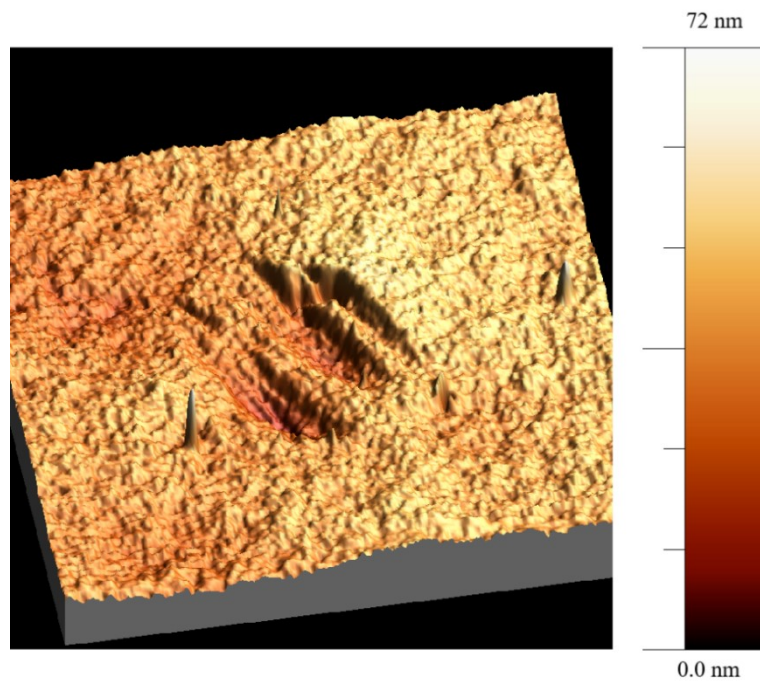

**Figure S4.** 3D image generated from the topographical AFM scan of the pristine membrane.

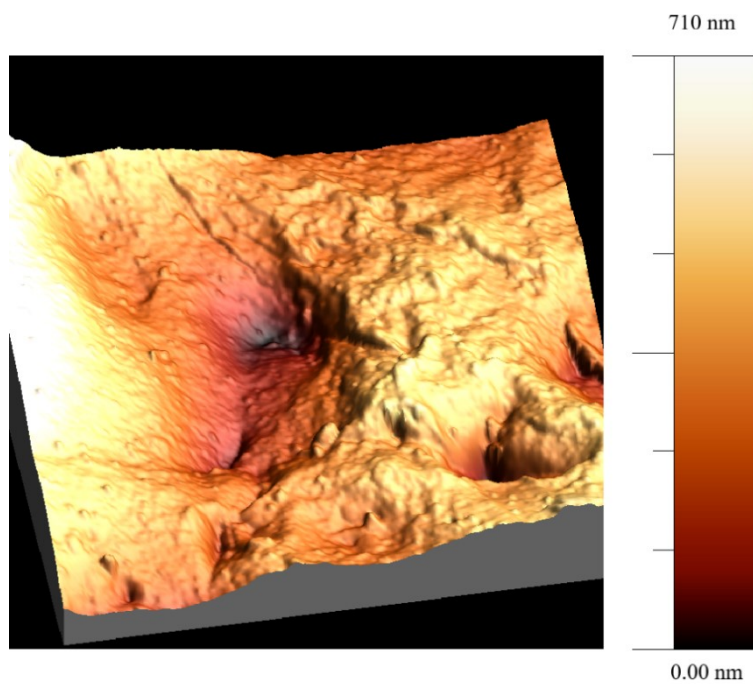

**Figure S5.** 3D image generated from the topographical AFM scan of the polydopamine-grafted membrane.

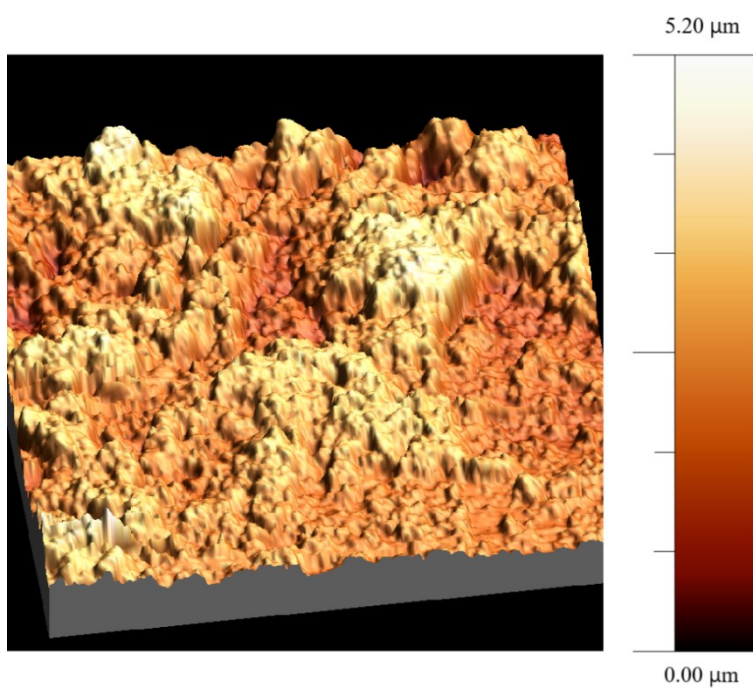

**Figure S6.** 3D image generated from the topographical AFM scan of the Fe/TNT@AC coated membrane.

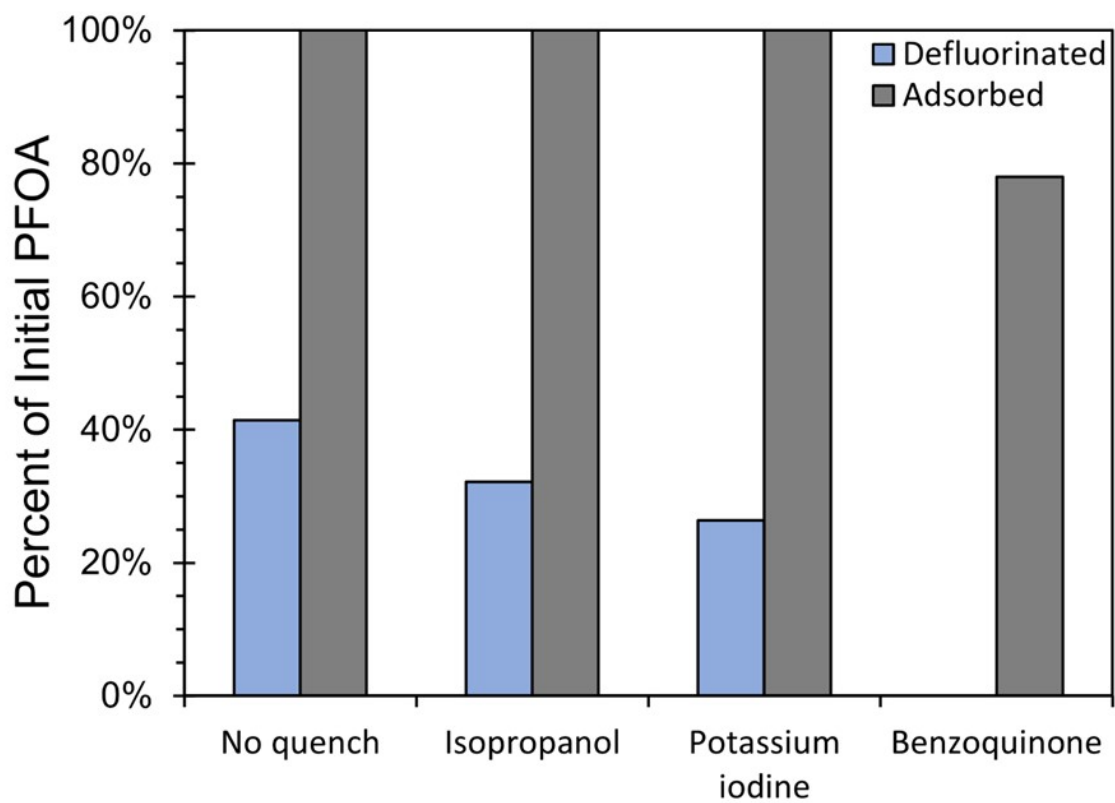

**Figure S7:** Quenching experiment with isopropanol (5 mM), potassium iodine (1 mM), and benzoquinone (1 mM) for 200 ppb PFOA solution treated with Fe/TNT@AC (1 g/L) under 4-hours UV irradiation in photoreactor.
